1 **Cryo-EM complex structure of active GPR75 with a nanobody**

2

3 Zilin Lv<sup>1,4</sup>, Yuntong He<sup>1,4</sup>, Yuning Xiang<sup>2,4</sup>, Jing Li<sup>1,4</sup>, Shuhao Zhang<sup>3</sup>, Fanhao Meng<sup>2</sup>, Baoliang  
4 Lan<sup>3</sup>, Hanbo Guo<sup>1</sup>, Dong He<sup>1</sup>, Yanxia Wang<sup>2</sup>, Huimin Zhao<sup>2</sup>, Wei Zhuo<sup>1</sup>, Yujie Liu<sup>1</sup>, Xiangyu  
5 Liu<sup>3</sup>, Xiaodan Ni<sup>2\*</sup>, Jie Heng<sup>1\*</sup>

6

7 **Affiliations:**

8 <sup>1</sup>Protein and Crystallography Department, Shuimu BioSciences Ltd., Life Science Park,  
9 Changping District, Beijing 102206, China

10 <sup>2</sup>Cryo-EM Center, Shuimu Biosciences Ltd., 7 Science Park Road ZGC Life Science Park,  
11 Changping District, Beijing 102206, China

12 <sup>3</sup>School of Pharmaceutical Sciences, Tsinghua University, Beijing 100084, China

13 <sup>4</sup>These authors contributed equally: Zilin Lv, Yuntong He, Yuning Xiang, Jing Li

14

15 \*Correspondence: [nixiaodan@shuimubio.com](mailto:nixiaodan@shuimubio.com) (X.N.) or [hengjie@shuimubio.com](mailto:hengjie@shuimubio.com) (J.H.)

16 **Abstract**

17

18 Although there has been enormous progress in the last half-century in the drug discovery  
19 targeting obesity and associated co-morbidities, the clinical treatment of obesity remains  
20 tremendously challenging. GPR75 is an orphan receptor and is suggested to be a potential novel  
21 target for the control of obesity and related metabolic disorders. Inhibition of the GPR75  
22 signaling pathway by small molecules, antibodies, or genetic manipulations may provide a  
23 therapeutic strategy for obesity. Here, we report the active-like Cryo-EM structure of human  
24 GPR75 with an intracellular nanobody, which reveals the receptor activation mechanism. The  
25 extensive interaction network required to achieve the active structure helps explain the allosteric  
26 coupling between the orthosteric pocket and the G-protein coupling domain. The well-defined  
27 orthosteric ligand binding pocket of human GPR75 provides a structural basis for anti-obesity  
28 drug discovery.

## 29 Introduction

30

31 The prevalence of obesity and associated co-morbidities has become a global healthcare  
32 challenge in the 21<sup>st</sup> century<sup>1</sup>. From the data from WHO, worldwide cases of obesity have nearly  
33 tripled since 1975. Obesity is a chronic and degenerative disease associated with other metabolic  
34 syndromes and related disorders, like cardiovascular diseases<sup>2</sup>, type 2 diabetes<sup>1</sup>, hypotension<sup>3</sup>,  
35 and cancers at a dozen of anatomic sites<sup>4</sup>. Developing anti-obesity medications is tremendously  
36 challenging because of multiple adverse side effects observed in the history of clinical  
37 treatment<sup>5</sup>. As a result, numerous drugs approved for treating obesity have been withdrawn from  
38 the market. Therefore, pharmacological treatment of obesity urgently requires more effective,  
39 safer, and long-term medicines to facilitate sustained body weight loss. Although a number of  
40 genes that result in severe obesity have been identified<sup>6</sup>, the multiple mechanisms and complex  
41 physiological systems of obesity and associated co-morbidities call for new targets and drug  
42 development strategies.

43

44 GPR75 is a member of the G protein-coupled receptor family and is a novel target for the clinical  
45 treatment of obesity<sup>7</sup>. Human GPR75 haploinsufficiency exhibits a striking phenotype of low  
46 body fat, and GPR75 knockout mice are hypophagic and thin, improving glucose tolerance and  
47 insulin sensitivity<sup>8</sup>. GPR75 was first cloned and identified as an orphan GPCR in the human  
48 retinal pigment epithelium and different brain region<sup>9</sup>. A recent result indicates that 20-  
49 hydroxyeicosatetraenoic acid (20-HETE), a product of cytochrome P450 (CYP) 4A and 4F  
50 isozymes, functions as an endogenous agonist for GPR75<sup>10</sup>. 20-HETE is a potent  
51 vasoconstrictor, and upregulation of the production of this compound is related to hypertension  
52 and cardiovascular diseases associated with increases in blood pressure<sup>11,12</sup>. A transgenic mouse  
53 model overexpressing 20-HETE synthase, together with high-fat diet feeding, displayed  
54 hyperglycemia and impaired glucose metabolism<sup>13</sup>. Knockdown GPR75 in a mouse model with  
55 20-HETE dependent hypertension prevented smooth muscle contractility, vascular remodeling,  
56 and blood pressure elevation<sup>10</sup>. Meanwhile, blockade of the 20-HETE/GPR75 signaling pathway  
57 with 20-HETE mimics lowers blood pressure and alters vascular function in mice<sup>14</sup>. Besides,  
58 some studies suggested that the chemokine CCL5 function as an agonist of GPR75<sup>15,16</sup>, playing a  
59 role in insulin secretion<sup>17,18</sup>. Collectively, inhibition of GPR75 may provide a therapeutic  
60 strategy for obesity and co-morbidities.

61

62 Here, we report the Cryo-EM structure of human GPR75 with an intracellular G protein mimic  
63 nanobody NbH3 at 3.6 Å. The structural analysis of GPR75 indicated that the receptor is  
64 stabilized in an active-like state by the NbH3. The overall structure features of GPR75 are  
65 similar to previously reported Class A GPCR, like  $\beta_2$ AR. However, some famous conserved  
66 motifs in Class A GPCR are not conserved in GPR75, which indicates a special conformational  
67 allosteric modulation mechanism. In addition, the orthosteric ligand binding pocket of GPR75 is  
68 formed by many polar and hydrophobic residues, which may improve the development of in-  
69 silico drug discovery.

70

71

72

73

74

## 75 **Results:**

### 76 **The overall structure of GPR75-NbH3**

77  
78 Due to the heterogeneity of GPCR structure, a specific fab fragment or nanobody has been used  
79 to stabilize the GPCR conformation for structural study as previously reported (Fig. S1). We  
80 develop a GPR75-specific nanobody by yeast surface display system and evaluate the nanobody  
81 binding ability by size exclusion chromatography and 2D classification. We identified a  
82 nanobody that specifically binds to the intracellular region of GPR75, as illustrated in the 2D  
83 classification result (Fig. S2). A total 14,777 good micrographs were selected for further data  
84 processing and were reconstituted to an overall 3.6 Å map (Fig. S2, S3). Fig. 1a shows an overall  
85 structure of bril-fused GPR75 in complex with NbH3, which binds on the intracellular surface of  
86 GPR75 with the third complementarity-determining region (CDR3) anchoring in the receptor  
87 core. A classical orientation of nanobody in the GPCR complex is the CDR3 projects into the  
88 core of the receptor nearly vertically<sup>19-24</sup>, while the NbH3 parallelly floats on the membrane  
89 plane. As a result, the CDR3 of NbH3 not only occupies the classical downstream transducer  
90 binding pockets, a hotspot epitope like other GPCR-nanobody complexes (Fig. 1b), but also  
91 swings into a second cleft formed by ICL1, TM7, and H8. Additionally, several  
92 hydrophobic/aromatic residues, including <sup>Nb</sup>Y103, <sup>Nb</sup>Y105, <sup>Nb</sup>L106, and <sup>Nb</sup>W107, contribute to  
93 stabilizing the receptor conformation (Fig. 1c).

94  
95 To interpret the conformational state of the GPR75-NbH3 complex, we superpose the GPR75  
96 structure with the inactive, partially active, and fully active  $\beta_2$ AR structures, stabilizing by  
97 conformational selective nanobodies Nb60<sup>23</sup>, Nb71<sup>25</sup>, and Nb80<sup>24</sup>, respectively (Fig. 2a). To our  
98 surprise, the root mean square deviation (r.m.s.d.) over all the transmembrane helices of the  
99  $\beta_2$ AR (274 C $\alpha$  atoms) is 4.43 Å, 3.55 Å, and 3.12 Å, respectively. The smaller r.m.s.d. indicates  
100 GPR75 is an active-like state. Because we didn't include ligand in the receptor purification,  
101 nanobody screening, and the following Cryo-EM sample preparation step due to the good  
102 monomeric behavior in the receptor, the initial expectation is to get the inactive GPR75 structure.  
103 For GPCR targets with functional versatility and conformational plasticity, the apo receptor  
104 usually prefers to stay in the inactive state according to the energy landscape theory<sup>26-28</sup>. It is  
105 unlikely that the active-like conformation of GPR75 is due to bril-fusion because the bril-fused  
106 GPCR structures exhibit an inactive structure in the presence of antagonist<sup>29</sup>, and intermediate  
107 state<sup>30</sup> or active state<sup>31</sup> in the presence of an agonist.

### 108 109 **The active-like feature of the GPR75 structure**

110 The structural features of GPR75, for example, an outward movement of TM6 compared with  
111 inactive  $\beta_2$ AR, are associated with an active-like state. The TM6 movement is similar to the  
112 partially activated salmeterol- $\beta_2$ AR-Nb71 complex<sup>25</sup> (Fig. 2b). Because not all activated GPCR  
113 structures present large-scale rearrangements in the cytoplasmic region of TM6, it's impossible  
114 to interpret the activation extent simply by TM6 movement. The subtle inward movement of  
115 TM7 and close contact between TM5-TM6 may also reflect a conserved contact rearrangement  
116 upon Class A receptor activation<sup>32</sup>. Nevertheless, we can't exclude the possibility that the close  
117 contact between TM5 and TM6 extension may result from the bril fusion design in consideration  
118 of the substitution of a long ICL3. Primarily, barcodes on TM5-ICL3-TM6 and TM3-ICL2-TM4  
119 collectively contribute to G $\alpha$  protein selectivity<sup>33</sup>. The GPR75 is mainly reported to be coupled

120 to downstream Gq protein by both 20-HETE and chemokine CCL5<sup>10,15</sup>, while it is also reported  
121 to couple to Gi protein by constitutive G protein coupling profile<sup>34</sup>.

122  
123 Strikingly, the most significant difference between the GPR75 and  $\beta_2$ AR structures is found at  
124 the extracellular end of the TM1, which moves close to TM7 about 10.7 Å at H38<sup>1.28</sup> position,  
125 relative to D29<sup>1.28</sup> in the inactive  $\beta_2$ AR (superscripts in this form indicate Ballesteros–Weinstein  
126 numbering for conserved GPCR residues) (Fig. 2c). The conformational change at the  
127 extracellular end of TM1 may partially attribute to the binding of NbH3, which caused a large  
128 movement of the ICL1 loop relative to TM8. The GxxG motif, which packs close to the  
129 conserved NPxxY motif, may play the role of a pivot point that wings the TM1 towards TM7  
130 and enables close contact of TM1 and TM7 in the extracellular end. The extracellular end of  
131 TM4, TM5, and TM6 show inward movement compared with the inactive  $\beta_2$ AR structure, which  
132 suggests a contraction of the ligand binding pocket due to the allosteric modulation of  
133 extracellular nanobody NbH3 (Fig. 2c).

134  
135 Class A GPCRs shows a set of common structural rearrangement during receptor activation<sup>32,35</sup>.  
136 The extracellular ligand-binding pocket and the intracellular effectors coupling regions are  
137 allosterically linked by several well-known but structurally and spatially disconnected motifs,  
138 like DRY, NPxxY, PIF, CWxP, and sodium binding pocket. The highly conserved triplet on  
139 TM3, the D(E)<sup>3.49</sup>-R<sup>3.50</sup>-Y<sup>3.51</sup> motif, usually plays a role in maintaining the receptor in an inactive  
140 state by forming an intrahelical salt bridge between the R3.50 and E<sup>6.30</sup> in TM6<sup>36</sup>. For GPR75,  
141 the DRY motif, residues H142<sup>3.49</sup>-R143<sup>3.50</sup>-L144<sup>3.51</sup>, is unique and non-canonical in Class A  
142 GPCR and is similar to the HRM motif in GPR162 and GPR153<sup>37</sup>. The ionic lock pair of  
143 R143<sup>3.50</sup> and D316<sup>6.30</sup> is conserved as other GPCRs, and the R143<sup>3.50</sup> adopts an extended  
144 conformation virtually identical to that seen in the  $\beta_2$ AR-Gs complex<sup>38</sup> (Fig. 3a). Meanwhile, the  
145 D316<sup>6.30</sup> is far away from the R143<sup>3.50</sup>, which reflects the release of potential structural restraints  
146 from TM3. Interestingly, the R143<sup>3.50</sup> form a cation- $\pi$  interaction with <sup>Nb</sup>Y103 as the contact of  
147 R131<sup>3.50</sup> and <sup>Gs</sup>Y391 in the  $\beta_2$ AR-Gs complex, which indicates the NbH3 stabilizes the GPR75  
148 conformation in a G protein mimic way (Fig. 3a)<sup>39</sup>. Similarly, the Y376<sup>7.53</sup> in NPxxY motif in  
149 TM7 shows a similar residue arrangement as activated  $\beta_2$ AR, rhodopsin<sup>40</sup>, and M2 muscarinic  
150 receptor<sup>22</sup>, in which a direct or water-mediated interaction between the Y<sup>5.58</sup> and Y<sup>7.53</sup> contributes  
151 to receptor activation.

152  
153 The conserved core triad, PIF motif (P<sup>5.50</sup>, I<sup>3.40</sup>, and F<sup>6.44</sup>), located just below the binding pocket  
154 (Fig. 3b-c), plays a role in initiating the cascade of structural changes upon receptor activation.  
155 One striking feature of GPR75 is the absence of a highly conserved P<sup>5.50</sup>, whose insertion causes  
156 a local unwinding of TM5. The C214<sup>5.50</sup> in GPR75 is non-conservative and only accounts for  
157 1.7% (5 from 292 Homo sapiens GPCRs) in Class A GPCR, the rest four GPCRs are GPR148,  
158 LGR5, LGR6, and MRGRE<sup>41</sup>. With the substitution of P<sup>5.50</sup> by C<sup>5.50</sup>, TM5 shows a more straight  
159 and rigid conformation but worse flexibility in response to ligand binding. The alternative  
160 version of V330<sup>6.44</sup> and C334<sup>6.48</sup> in GPR75, compared with F<sup>6.44</sup> and W<sup>6.48</sup> in the  $\beta_2$ AR, have an  
161 irregular small side chain residue, which may confer better allosteric properties and lower the  
162 energy barrier for receptor activation.

163  
164 Another structural rearrangement during Class A GPCR activation is the formation of TM3-TM7  
165 contact<sup>32,42</sup>. In the inactive state of the receptor, a sodium binding site is coordinated by D<sup>2.50</sup>

166 (92.1% conservative), S<sup>3.39</sup>(71.6% conservative), N<sup>7.45</sup>(65.4% conservative), and N<sup>7.49</sup>(71.9%  
167 conservative). The collapse of the sodium binding pocket will lead to a denser repacking of the  
168 four residues and initiate the movement of TM7 toward TM3. As shown in Fig. S4, unlike other  
169 inactive receptors, there is no space in the classical sodium binding, which also suggests a  
170 shrinking interhelical contact. A similar interhelical hydrogen bond network between the  
171 GPR75-NbH3 and the  $\beta_2$ AR-Gs complex implies a structural rearrangement due to the allosteric  
172 effect of the intracellular nanobody.

173

### 174 **The ligand binding pocket of the GPR75 structure**

175 The well-known structural plasticity of GPCR is the G protein binding pocket, and the agonist  
176 binding pocket is allosterically coupled<sup>43</sup>. Because of the broad diversity of Class A GPCR  
177 ligand repertoire, it is not possible to see a common ligand recognizing pattern across all  
178 receptors<sup>44,45</sup>. The active-like conformation we observed in GPR75 implies a closed, active, and  
179 high-affinity state for agonists. We observed continuous density in the orthosteric ligand binding  
180 pocket, but it's hard to define whether it's the ICL2 loop density or unknown ligands (Fig. 4a-b).  
181 The ICL2 loop possibly forms a lid over the ligand binding pocket to modulate initial ligand  
182 recognition<sup>46</sup>. The ICL2 in other Class A GPCR shows highly differentiated structures, forming  
183 helices, sheets, or intrinsically disordered loops. Based on the position of the conserved disulfide  
184 pair between C118(TM3) and C188(ICL2), we suspect that the density map in the pocket may  
185 come from the ICL2 loop, while we can't extrude the possibility that it is unknown molecule  
186 coming from cells or purification conditions. Although, due to the low resolution in the  
187 extracellular surface region, we can't well define a full model of all ECL loops, the residue  
188 density of GPR75 in the orthosteric ligand binding pocket is well enough to identify the valuable  
189 pocket.

190

191 Compared with the ligand binding pocket of activated  $\beta_2$ AR and GPR75, the latter show shallow,  
192 spacious pockets with slightly negatively charged (Fig. 4a-b, S5). The pocket is on top of the PIF  
193 (as C<sup>5.50</sup>/L<sup>3.40</sup>/V<sup>6.44</sup>) and CWxP (C333<sup>6.47</sup>/C334<sup>6.48</sup>/P336<sup>6.50</sup>) motif to facilitate conformational  
194 rearrangement upon agonist binding. Consistent with the consensus scaffold interface for ligand  
195 binding<sup>35</sup>, the major pocket of GPR75 is formed by the extracellular end of TM2, TM3, TM5,  
196 TM6, and TM7, packaged by a number of polar and hydrophobic residues. The polar residue  
197 cluster, S125<sup>3.32</sup>, S126<sup>3.33</sup>, S132<sup>3.39</sup>, Y207<sup>5.43</sup>, Y207<sup>5.43</sup>, and E358<sup>7.35</sup>, may contribute to the  
198 endogenous ligand interaction in cells in a manner mentioned before<sup>44</sup> (Fig. 4c). Historically,  
199 various 20-HETE-related pharmaceutical agents have been synthesized, including 20-HETE  
200 agonists and antagonists<sup>47</sup>. The structure-activity relationship analysis of 20-HETE analogs  
201 indicates that 20-HETE agonists and antagonists require a carboxyl or an ionizable group on  
202 carbon 1 and a double bond near the 14 or 15 carbon. Meanwhile, 20-HETE agonists also require  
203 a functional group capable of hydrogen bonding on carbon 20 or 21, whereas antagonists lack  
204 this reactive group<sup>48</sup>. It should be noted that three mutations, S205<sup>5.41</sup>, T212<sup>5.48</sup>, and S219<sup>5.55</sup>,  
205 predicted to involve 20-HETE-GPR75 interaction, are not located in the central cavity of  
206 orthosteric ligand binding pockets of the active-like structure of GPR75<sup>49</sup>.

207

### 208 **Conclusion**

209 The GPR75 protein-truncating variants in large-scale human populations are genetically  
210 associated with lower body mass index<sup>7</sup>. The active-like Cryo-EM structure of GPR75-NbH3  
211 here provides a clue to revealing the receptor activation mechanism, which is critical for

212 developing novel therapeutic anti-obesity drugs. Comparison of active-like GPR75 structure with  
213 other active-state Class A GPCR structures offers insights into shared mechanisms for receptor  
214 activation. The extensive interaction network required to achieve the active structure helps  
215 explain the allosteric coupling between the orthosteric pocket and the G-protein coupling  
216 interface. Considering the physicochemical property of the reported agonist, 20-HETE, it looks  
217 reasonable that the shallow hydrophobic pockets will fit the ligand and initiate conformational  
218 transmission in a manner observed in the other Class A receptors. Although several 20-HETE  
219 derivative antagonists have been developed, their fatty acid property with a rather high albumin  
220 binding rate in the plasma may restrict the distribution of these compounds to targeted tissues.  
221 The structural-based drug design targeting GPR75 may accelerate the discovery of a lead  
222 compound with novel properties<sup>50</sup>. Besides, therapeutic approaches based on genetic  
223 manipulations, such as siRNA oligonucleotide, also provide an alternative therapeutic  
224 intervention for the treatment of obesity and associated co-morbidities by targeting the GPR75.  
225

## 226 **Method:**

### 227 **Expression and purification of the human GPR75 receptor**

228 A truncated human GPR75 receptor (residue 1-395) bearing an amino-terminal haemagglutinin  
229 signal sequence followed by the FLAG epitope, and a carboxy-terminal Strep-tag and 6xHis tag  
230 was cloned into pFastBac-1 vector. To enhance the expression level of GPR75, twenty-four  
231 amino acids from the  $\beta_2$ AR receptor (MGQPGNGSAFLLAPNRSHAPDHDV) were used to  
232 replace the original residues 1-31 in a modified version of the GPR75 receptor. Furthermore, the  
233 Brill sequence was used to replace the original ICL3 loop (237-306) to enhance receptor stability.  
234 The receptor was expressed in *Sf9* insect cells using the Bac-to-Bac baculovirus system. The  
235 expression and purification of the GPR75 receptor are according to the methods described  
236 previously.<sup>38</sup> Briefly, the GPR75 receptor was expressed for 48 hours after infection with  
237 recombinant baculovirus. Cells were lysed, and extracted using a buffer containing 20 mM Tris,  
238 pH 7.5, 750 mM NaCl, 0.5% lauryl maltose neopentyl glycol (LMNG), 0.03% CHS, 0.2%  
239 sodium cholate, 2.5  $\mu$ g/ml leupeptin. Ni-NTA affinity purification was used as the initial  
240 purification step and followed by Flag affinity chromatography for further purification. The  
241 eluted receptors were loaded onto a Superdex 200 column equilibrated in a buffer containing 20  
242 mM Tris, pH 7.5, 150 mM NaCl, 0.002% LMNG, 0.00015% CHS. Subsequently, the  
243 concentrated sample was then aliquoted, flash-frozen, and stored at -80°C.  
244

### 245 **Isolation of nanobody binders from library**

246 Nanobodies were selected from a synthetic yeast display nanobody library<sup>51</sup>. In the first round of  
247 screening,  $5 \times 10^9$  cells of the yeast display nanobody library were washed and resuspended in 2  
248 mL selection buffer (20 mM Tris pH 7.5, 150 mM NaCl, 0.06% LMNG, 0.003% CHS, 0.02%  
249 sodium cholate, 5 mM  $MgCl_2$ ) and then incubated with FITC-labeled anti-Flag M1 antibody and  
250 anti-FITC microbeads (Miltenyi) at 4°C for 40 min. Non-specific binding nanobodies were  
251 removed by pre-clear which involved passing the yeast through an LD column (Miltenyi), and  
252 the remaining yeast from the flow-through was incubated with 400 nM GPR75 for 30 min at  
253 4°C, and then washed once with 2 mL selection buffer. Yeast was stained with 200 nM FITC-  
254 labeled anti-Flag M1 antibody at 4°C for 20 min, followed by washing with selection buffer to  
255 remove excess M1 antibody. After incubation with anti-FITC microbeads at 4°C for 20 min,  
256 nanobodies specifically bound to GPR75 were enriched by passing through LS column  
257 (Miltenyi), and cultured for 24 hours in -TRP medium at 30°C. Rounds 2 of MACS selection

258 were performed similarly with  $1 \times 10^8$  yeast, and cells were washed and resuspended in 500 $\mu$ L  
259 buffer, incubated with 200 nM GPR75, stained with FITC-labeled anti-Flag antibody M1 and  
260 anti-FITC microbeads.  
261 After 2 rounds of MACS, the diversity of yeast display nanobody library was less than  $10^6$ . In  
262 order to test the enrichment effect,  $10^6$  cells were stained with 100 nM GPR75, 100 nM FITC-  
263 labeled anti-Flag antibody M1, and Alexa Fluor 647-labeled anti-HA antibody,  $\sim 3.3\%$  of the  
264 MACS2 pool was positive for GPR75 binding. The enriched yeasts were used for further  
265 selection by FACS.  $10^7$  cells were incubated with 200 nM GPR75 in 100 $\mu$ L selection buffer at  
266 4°C for 1h. After incubation, yeast cells were washed twice with ice-cold selection buffer, then  
267 incubated with 100 nM FITC-labeled anti-Flag antibody M1 and 0.5  $\mu$ g Alexa Fluor 647-labeled  
268 anti-HA antibody (Cell Signaling Technology) in 100 $\mu$ L selection buffer at 4°C for 20 min. After  
269 incubation, yeast cells were washed three times with ice-cold selection buffer, suspended in 1mL  
270 of selection buffer, and sorted on FACS Aria (BD). Typically, 0.5% of the GPR75 binding  
271 population was gated for collection. Collected cells were grown in -TRP medium, and about 15%  
272 of the FACS1 pool was positive for GPR75 binding. After FACS2, plate  $2 \times 10^4$  cells in -TRP  
273 agar and separate for a single colony for sequencing.  
274

### 275 **Expression and purification of nanobody and GPR75-nanobody complex**

276 The isolated nanobody sequence was cloned into the pET26b vector with an amino-terminal  
277 PelB leader sequence (MKYLLPTAAAGLLLLAAQPA) for periplasmic protein expression and  
278 with a C-terminal 6xHis-tag, and transformed into *E. coli* cells BL21(DE3). Cells were induced  
279 in Terrific Broth medium with 1 mM IPTG at OD600 of 1.2 and cultured with shaking at 22°C  
280 for 20 h. Periplasmic protein was obtained by osmotic shock, and the nanobodies were purified  
281 using Ni-NTA chromatography, followed by a Superdex 200 column equilibrated in buffer (20  
282 mM HEPES, pH 7.5, 150 mM NaCl). The eluted sample was concentrated, aliquoted, flash-  
283 frozen, and stored at -80°C.  
284

### 285 **Preparation of GPR75-nanobody complex and EM data acquisition**

286 The complex was formed by mixing the receptor with 5x excess of the selected nanobody in a  
287 buffer condition (20mM Tris, PH 7.5, 150mM NaCl, 0.002% LMNG, 0.00015% CHS). The  
288 complex was preincubated for 1 hour on ice before loading to a pre-equilibrated Superdex 200  
289 column. The eluted sample was concentrated for grid preparation.  
290 An aliquot of 4  $\mu$ L protein sample of GPR75-NbH3 complex at a concentration of 7.6 mg/ml  
291 was applied onto a glow-discharged 300 mesh grid (Quantifoil Au R1.2/1.3), blotted with filter  
292 paper for 3.0 s and plunge-frozen in liquid ethane using a Thermo Fisher Vitrobot Mark IV.  
293 Cryo-EM micrographs were collected on a 300kV Thermo Fisher Titan Krios G3i electron  
294 microscope equipped with a K3 direct detection camera and a BioQuantum image filter (GIF: a  
295 slit width of 20eV). The micrographs were collected at a calibrated magnification of x130,000,  
296 yielding a pixel size of 0.27 Å at a super-resolution mode. In total, 14, 777 micrographs were  
297 collected at an accumulated electron dose of  $50e^- \text{Å}^{-2} \text{s}^{-1}$  on each micrograph that was fractionated  
298 into a stack of 32 frames with a defocus range of -1.0  $\mu$ m to -2.0  $\mu$ m.  
299

### 300 **Cryo-EM data processing, model building, and refinement**

301 Beam-induced motion correction was performed on the stack of frames using MotionCorr<sup>252</sup>.  
302 The contrast transfer function (CTF) parameters were determined by CTFFIND4<sup>53</sup>. A total 14,  
303 777 good micrographs were selected for further data processing using cryoSPARC<sup>54</sup>. Particles



304 were auto-picked by the blob picker and template picker program in cryoSPARC, followed by 3  
305 rounds of reference-free 2D classifications. Next, 1, 338, 445 particles were selected from good  
306 2D classes and were subjected to 3 rounds of multi-reference 3D classification using starting  
307 models generated using conventional 3D classifications. One converged 3D class from each  
308 round of multi-reference 3D classifications with a feature containing GPR75-Bril-NbH3 was  
309 selected and removed duplicates. A last heterogeneous refinement was performed and 503,557  
310 particles from a 3D class showing the highest resolution feature were selected for a round of 3D  
311 refinement, yielding a final reconstruction at a global resolution of 3.64 Å based on the gold-  
312 standard Fourier shell correlation criterion at FSC=0.143. The local resolution was then  
313 calculated on the final density map.

314 The model of the GPR75-NbH3 complex was built by fitting a structure of the complex  
315 (predicted by AlphaFold2<sup>55</sup> and CryoNet) into the density map using UCSF Chimera<sup>56,57</sup>,  
316 followed by a manual model building of the complex molecules in COOT<sup>58</sup> and a real space  
317 refinement in PHENIX<sup>59</sup>. The model statistics were listed in Supplementary Table 1.

318

319

### 320 **Reference:**

- 321 1. Collaborators, G. 2015 O. *et al.* Health Effects of Overweight and Obesity in 195 Countries  
322 over 25 Years. *New Engl J Medicine* 377, 13–27 (2017).
- 323 2. Twig, G. *et al.* Body-Mass Index in 2.3 Million Adolescents and Cardiovascular Death in  
324 Adulthood. *New Engl J Medicine* 374, 2430–2440 (2016).
- 325 3. Mertens, I. L. & Gaal, L. F. Overweight, Obesity, and Blood Pressure: The Effects of Modest  
326 Weight Reduction. *Obes Res* 8, 270–278 (2000).
- 327 4. Avgerinos, K. I., Spyrou, N., Mantzoros, C. S. & Dalamaga, M. Obesity and cancer risk:  
328 Emerging biological mechanisms and perspectives. *Metabolis* 92, 121–135 (2019).
- 329 5. Kang, J. G. & Park, C.-Y. Anti-Obesity Drugs: A Review about Their Effects and Safety.  
330 *Diabetes Metabolism J* 36, 13–25 (2012).
- 331 6. van der Klaauw, A. A. & Farooqi, I. S. The Hunger Genes: Pathways to Obesity. *Cell* 161,  
332 119–132 (2015).
- 333 7. Akbari, P. *et al.* Sequencing of 640,000 exomes identifies GPR75 variants associated with  
334 protection from obesity. *Science* 373, eabf8683 (2021).
- 335 8. Powell, D. R. *et al.* Mice Lacking Gpr75 are Hypophagic and Thin. *Diabetes Metabolic*  
336 *Syndrome Obes Targets Ther* Volume 15, 45–58 (2022).
- 337 9. Tarttelin, E. E. *et al.* Cloning and Characterization of a Novel Orphan G-Protein-Coupled  
338 Receptor Localized to Human Chromosome 2p16. *Biochem Bioph Res Co* 260, 174–180 (1999).
- 339 10. Garcia, V. *et al.* 20-HETE Signals Through G-Protein-Coupled Receptor GPR75 (Gq) to  
340 Affect Vascular Function and Trigger Hypertension. *Circ Res* 120, 1776–1788 (2017).

- 341 11. Williams, J. M., Murphy, S., Burke, M. & Roman, R. J. 20-Hydroxyeicosatetraenoic  
342 Acid; A New Target for the Treatment of Hypertension. *J Cardiovasc Pharm* 56, 336–  
343 344 (2010).
- 344 12. Froogh, G., Garcia, V. & Schwartzman, M. L. The CYP/20-HETE/GPR75 axis in  
345 hypertension. *Adv Pharmacol* 94, 1–25 (2022).
- 346 13. Gilani, A. *et al.* 20-HETE interferes with insulin signaling and contributes to obesity-driven  
347 insulin resistance. *Prostag Oth Lipid M* 152, 106485 (2021).
- 348 14. Agostinucci, K. *et al.* Blockade of 20-hydroxyeicosatetraenoic acid receptor lowers blood  
349 pressure and alters vascular function in mice with smooth muscle-specific overexpression of  
350 CYP4A12-20-HETE synthase. *J Hypertens* 40, 498–511 (2022).
- 351 15. Ignatov, A., Robert, J., Gregory-Evans, C. & Schaller, H. C. RANTES stimulates Ca<sup>2+</sup>  
352 mobilization and inositol trisphosphate (IP<sub>3</sub>) formation in cells transfected with G protein-  
353 coupled receptor 75. *Brit J Pharmacol* 149, 490–497 (2006).
- 354 16. Dedoni, S., Campbell, L. A., Harvey, B. K., Avdoshina, V. & Mochetti, I. The orphan G-  
355 protein-coupled receptor 75 signaling is activated by the chemokine CCL5. *J Neurochem* 146,  
356 526–539 (2018).
- 357 17. Liu, B. *et al.* The novel chemokine receptor, G-protein-coupled receptor 75, is expressed by  
358 islets and is coupled to stimulation of insulin secretion and improved glucose homeostasis.  
359 *Diabetologia* 56, 2467–2476 (2013).
- 360 18. Pappalardo, Z. *et al.* A Whole-Genome RNA Interference Screen Reveals a Role for Spry2 in  
361 Insulin Transcription and the Unfolded Protein Response. *Diabetes* 66, 1703–1712 (2017).
- 362 19. Miles, T. F. *et al.* Viral GPCR US28 can signal in response to chemokine agonists of nearly  
363 unlimited structural degeneracy. *Elife* 7, e35850 (2018).
- 364 20. Wingler, L. M. *et al.* Angiotensin and biased analogs induce structurally distinct active  
365 conformations within a GPCR. *Science* 367, 888–892 (2020).
- 366 21. Deshpande, I. *et al.* Smoothed stimulation by membrane sterols drives Hedgehog pathway  
367 activity. 571, 284–288 (2019).
- 368 22. Kruse, A. C. *et al.* Activation and allosteric modulation of a muscarinic acetylcholine  
369 receptor. *Nature* 504, 101–106 (2013).
- 370 23. Staus, D. P. *et al.* Allosteric nanobodies reveal the dynamic range and diverse mechanisms of  
371 G-protein-coupled receptor activation. 535, 448–452 (2016).
- 372 24. Rasmussen, S. G. F. *et al.* Structure of a nanobody-stabilized active state of the  $\beta$ 2  
373 adrenoceptor. 469, 175–180 (2010).

- 374 25. Masureel, M. *et al.* Structural insights into binding specificity, efficacy and bias of a  $\beta$ 2AR  
375 partial agonist. *Nature chemical biology* 14, 1059–1066 (2018).
- 376 26. Deupi, X. & Kobilka, B. K. Energy Landscapes as a Tool to Integrate GPCR Structure,  
377 Dynamics, and Function. *Physiology* 25, 293–303 (2010).
- 378 27. Nygaard, R. *et al.* The Dynamic Process of  $\beta$ 2-Adrenergic Receptor Activation. *Cell*  
379 152, 532–542 (2013).
- 380 28. Manglik, A. *et al.* Structural Insights into the Dynamic Process of  $\beta$ 2-Adrenergic  
381 Receptor Signaling. *Cell* 161, 1101–1111 (2015).
- 382 29. Chrencik, J. E. *et al.* Crystal Structure of Antagonist Bound Human Lysophosphatidic Acid  
383 Receptor 1. *Cell* 161, 1633–1643 (2015).
- 384 30. Wang, C. *et al.* Structural Basis for Molecular Recognition at Serotonin Receptors. *Science*  
385 340, 610–614 (2013).
- 386 31. Peng, Y. *et al.* 5-HT<sub>2C</sub> Receptor Structures Reveal the Structural Basis of GPCR  
387 Polypharmacology. *Cell* 172, 719–730.e14 (2018).
- 388 32. Zhou, Q. *et al.* Common activation mechanism of class A GPCRs. *eLife* 8, 463–31 (2019).
- 389 33. Flock, T. *et al.* Selectivity determinants of GPCR-G-protein binding. *Nature* 545, 317–322  
390 (2017).
- 391 34. Lu, S., Jang, W., Inoue, A. & Lambert, N. A. Constitutive G protein coupling profiles of  
392 understudied orphan GPCRs. *Plos One* 16, e0247743 (2021).
- 393 35. Venkatakrisnan, A. J. *et al.* Molecular signatures of G-protein-coupled receptors. *Nature*  
394 494, 185–194 (2013).
- 395 36. Rovati, G. E., Capra, V. & Neubig, R. R. The Highly Conserved DRY Motif of Class A G  
396 Protein-Coupled Receptors: Beyond the Ground State. *Mol Pharmacol* 71, 959–964 (2007).
- 397 37. Sreedharan, S. *et al.* The G protein coupled receptor Gpr153 shares common evolutionary  
398 origin with Gpr162 and is highly expressed in central regions including the thalamus, cerebellum  
399 and the arcuate nucleus. *Febs J* 278, 4881–4894 (2011).
- 400 38. Rasmussen, S. G. F. *et al.* Crystal structure of the  $\beta$ 2 adrenergic receptor-Gs protein complex.  
401 *Nature* 477, 549–555 (2011).
- 402 39. Rasmussen, S. G. F. *et al.* Crystal structure of the  $\beta$ 2 adrenergic receptor–Gs protein  
403 complex. *Nature* 477, 549–555 (2011).

- 404 40. Deupi, X. *et al.* Stabilized G protein binding site in the structure of constitutively active  
405 metarhodopsin-II. *Proc National Acad Sci* 109, 119–124 (2012).
- 406 41. Tamayo, J. C. G. *et al.* GPCR-SAS: A web application for statistical analyses on G protein-  
407 coupled receptors sequences. *Plos One* 13, e0199843 (2018).
- 408 42. Venkatakrishnan, A. J. *et al.* Diverse activation pathways in class A GPCRs converge near  
409 the G-protein-coupling region. *Nature* 536, 484–487 (2016).
- 410 43. DeVree, B. T. *et al.* Allosteric coupling from G protein to the agonist-binding pocket in  
411 GPCRs. 535, 182–186 (2016).
- 412 44. Vass, M. *et al.* Chemical Diversity in the G Protein-Coupled Receptor Superfamily. *Trends*  
413 *Pharmacol Sci* 39, 494–512 (2018).
- 414 45. Ballante, F., Kooistra, A. J., Kampen, S., Graaf, C. de & Carlsson, J. Structure-Based Virtual  
415 Screening for Ligands of G Protein–Coupled Receptors: What Can Molecular Docking Do for  
416 You? *Pharmacol Rev* 73, 527–565 (2021).
- 417 46. Xu, X. *et al.* Binding pathway determines norepinephrine selectivity for the human  $\beta$ 1AR  
418 over  $\beta$ 2AR. *Cell Res* 1–11 (2020) doi:10.1038/s41422-020-00424-2.
- 419 47. Zhang, C. *et al.* Conflicting roles of 20-HETE in hypertension and renal end organ damage.  
420 *Eur J Pharmacol* 833, 190–200 (2018).
- 421 48. Alonso-Galicia, M., Falck, J. R., Reddy, K. M. & Roman, R. J. 20-HETE agonists and  
422 antagonists in the renal circulation. *Am J Physiol-renal* 277, F790–F796 (1999).
- 423 49. Pascale, J. V. *et al.* Uncovering the signalling, structure and function of the 20-HETE-GPR75  
424 pairing: Identifying the chemokine CCL5 as a negative regulator of GPR75. *Brit J Pharmacol*  
425 (2021) doi:10.1111/bph.15525.
- 426 50. Congreve, M., Graaf, C. de, Swain, N. A. & Tate, C. G. Impact of GPCR Structures on Drug  
427 Discovery. *Cell* 181, 81–91 (2020).
- 428 51. McMahon, C. *et al.* Yeast surface display platform for rapid discovery of conformationally  
429 selective nanobodies. *Nature Structural & Molecular Biology* 25, 289–296 (2018).
- 430 52. Zheng, S. Q. *et al.* MotionCor2: anisotropic correction of beam-induced motion for improved  
431 cryo-electron microscopy. *Nat Methods* 14, 331–332 (2017).
- 432 53. Rohou, A. & Grigorieff, N. CTFFIND4: Fast and accurate defocus estimation from electron  
433 micrographs. *J Struct Biol* 192, 216–221 (2015).
- 434 54. Punjani, A., Rubinstein, J. L., Fleet, D. J. & Brubaker, M. A. cryoSPARC: algorithms for  
435 rapid unsupervised cryo-EM structure determination. *Nat Methods* 14, 290–296 (2017).

- 436 55. Jumper, J. *et al.* Highly accurate protein structure prediction with AlphaFold. *Nature* 1–11  
437 (2021) doi:10.1038/s41586-021-03819-2.
- 438 56. Bryant, P., Pozzati, G. & Elofsson, A. Improved prediction of protein-protein interactions  
439 using AlphaFold2. *Nat Commun* 13, 1265 (2022).
- 440 57. Pettersen, E. F. *et al.* UCSF Chimera—A visualization system for exploratory research and  
441 analysis. *J Comput Chem* 25, 1605–1612 (2004).
- 442 58. Bai, X., Rajendra, E., Yang, G., Shi, Y. & Scheres, S. H. Sampling the conformational space  
443 of the catalytic subunit of human  $\gamma$ -secretase. *Elife* 4, e11182 (2015).
- 444 59. Adams, P. D. *et al.* PHENIX: a comprehensive Python-based system for macromolecular  
445 structure solution. *Acta Crystallogr Sect D Biological Crystallogr* 66, 213–221 (2010).

446

447 **Acknowledgments:**

448 We thank Pan Li and Haibin Liu from Shuimu BioSciences for their guidance in the model building with  
449 CryoNet. We thank Andrew Kruse from Harvard Medical School for kindly providing the synthetic yeast  
450 nanobody library. **Funding:** This research was funded by Shuimu BioSciences.

451

452 **Contributions:**

453 Z.L., Y.H., H.G., and D.H. performed experiments, Z.L., S.Z., B.L. performed nanobody screening  
454 experiments, X.L. supervised nanobody screening, Y.X., F.M., Y.W., and H.Z. prepared grid, collected data  
455 and processed data, J.L. built the model and assisted structure analysis, J.L., W.Z., Y.L., and J.H. supervised  
456 experiments and analyzed the data, X.N. supervised Cryo-EM data processing, J.H. wrote the manuscript.

457 **Figure legends**

458

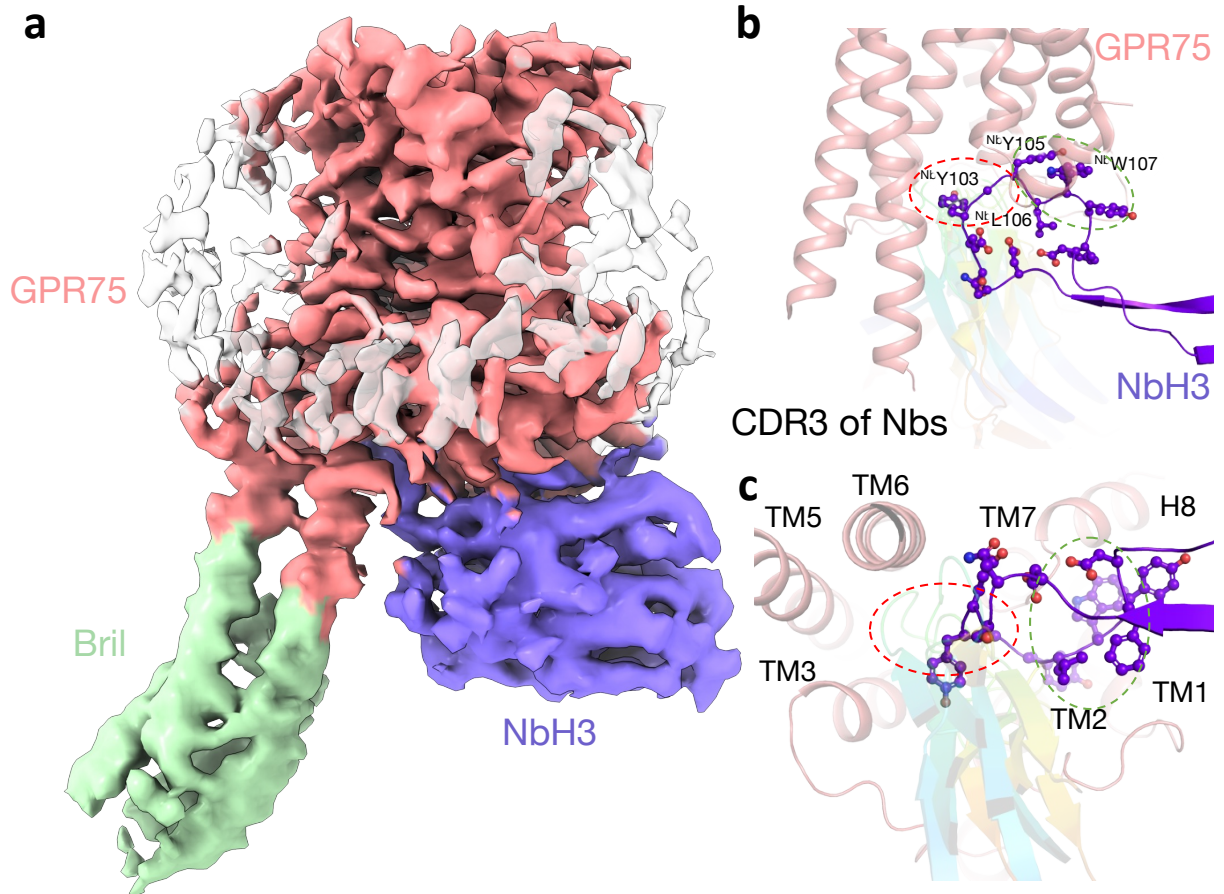

459

460 **Fig. 1 The overall structure of GPR75-NbH3.**

461 (a). Orthogonal view of the density map for the GPR75 (salmon) - NbH3 (nitrogen)  
462 complex. The fused bril domain is shown in lime green. (b, c) The CDR3 loop of NbH3 occupied  
463 two epitopes, one is the classical epitope shared by a number of GPCR nanobodies (indicated as  
464 red dash circle), and the other is a unique epitope formed by ICL1, TM7, and H8 (indicated as  
465 green dash circle). The CDR3 of several GPCR-specific nanobodies (PDB ID: 6O3C, 6OS2,  
466 6MXT, 5WB1, 4MQT, 5JQH, 3P0G, 3VG9) is shown as a rainbow cartoon, and residues in  
467 NbH3 mediating directly interaction are shown as sticks and spheres.

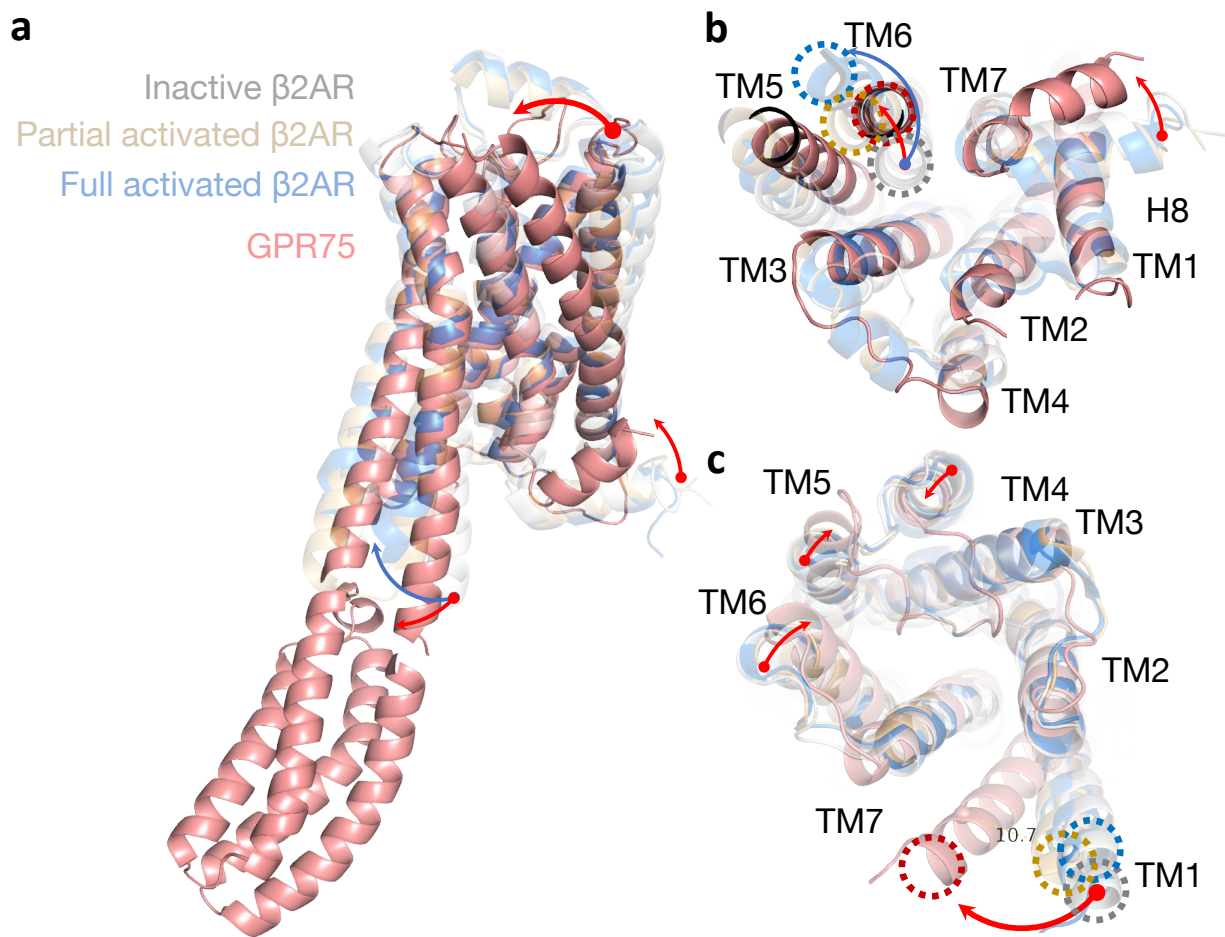

468

469

**Fig. 2 The superposed structures of the GPR75 and three different  $\beta_2$ AR structures.**

470

(a). The overall structure of the active-like GPR75 (salmon) compared with the inactive  $\beta_2$ AR (grey, PDB ID: 6MXT), partially activated  $\beta_2$ AR (yellow-orange, PDB ID: 5JQH), and fully activated  $\beta_2$ AR (light blue, PDB ID: 3P0G). The TM movement of the GPR75 relative to inactive  $\beta_2$ AR is noted by a red arrow and the TM movement of fully active  $\beta_2$ AR relative to inactive  $\beta_2$ AR is noted by a blue arrow.

475

476

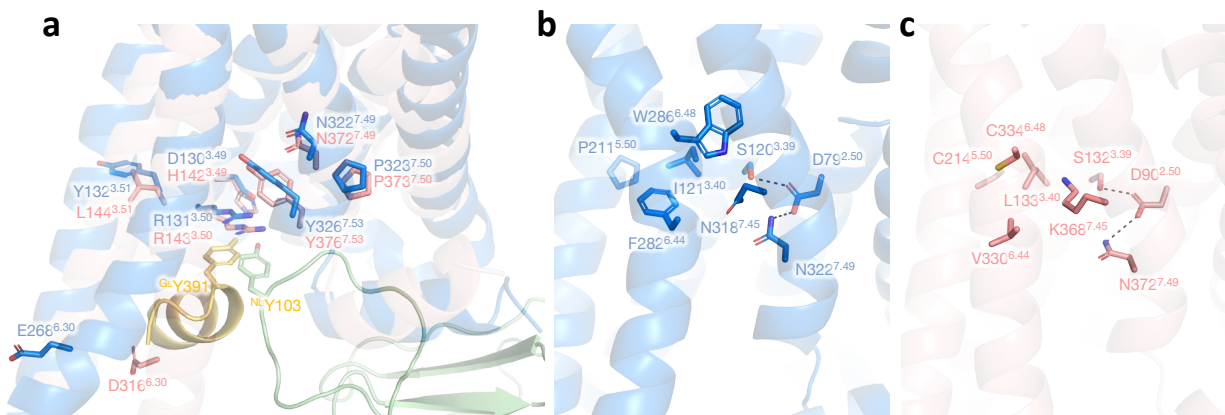

477

478 **Fig. 3 The active-like structural feature of the GPR75.**

479 (a). The structural feature of the HRL (DRY) motif and NPxxY motif in the GPR75 (salmon)-  
 480 NbH3 (green) complex and in the activated  $\beta_2$ AR (light blue) - Gs (yellow) complex. The  
 481 <sup>Nb</sup>Y103 mimics a similar interaction pattern as in the  $\beta_2$ AR-Gs complex (PDB ID: 3SN6). (b,c).  
 482 Similar hydrogen bond patterns among TM2, TM3, and TM7 near the CLV (PIF) motif and  
 483 classical sodium binding sites in the  $\beta_2$ AR-Gs complex (b, light blue) and the GPR75-NbH3  
 484 complex (c, salmon).

485

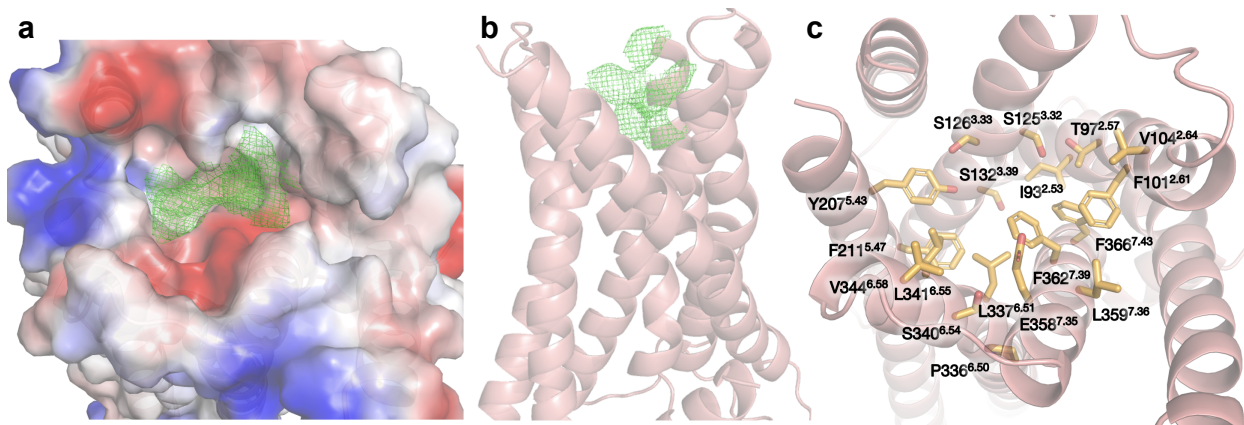

486

487 **Fig. 4 The orthosteric ligand binding pocket of GPR75.**

488 (a). Top surface view of the density in the orthosteric ligand binding pockets. (b). Top surface  
 489 view of the orthosteric ligand binding pockets. (c). Some hydrophobic and polar residues are  
 490 involved in forming the orthosteric ligand binding pockets.

491

492

493

494



495 **Supplementary Figures**

496

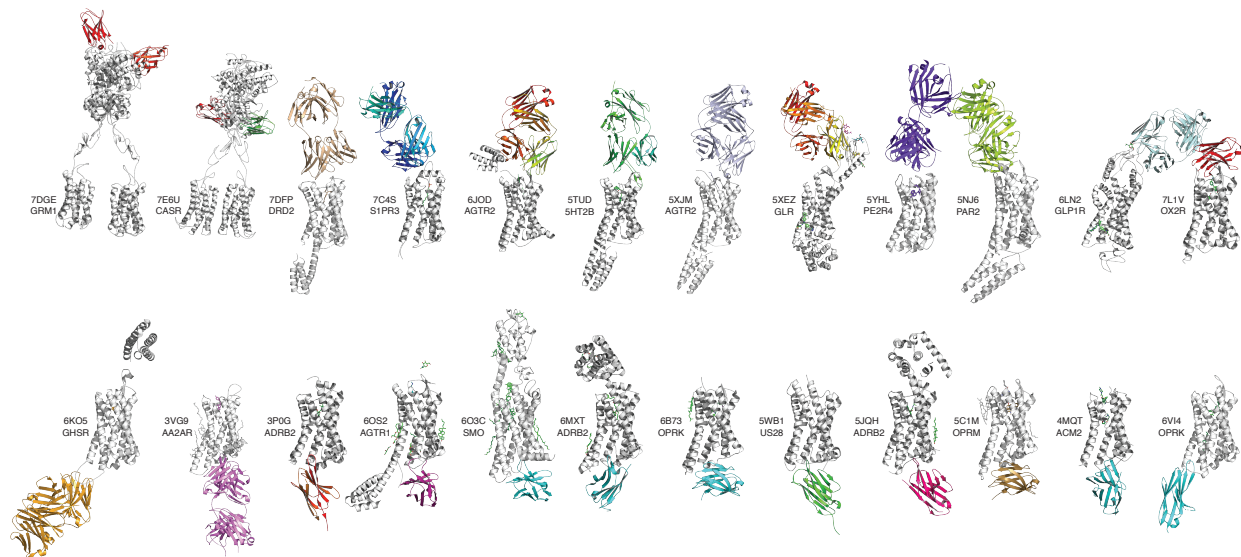

497

498 **Fig S1. Collective structures of GPCR and fab fragment or nanobody.** Receptors are shown  
499 as grey cartoons and the fab fragment or nanobody as colored cartoons.

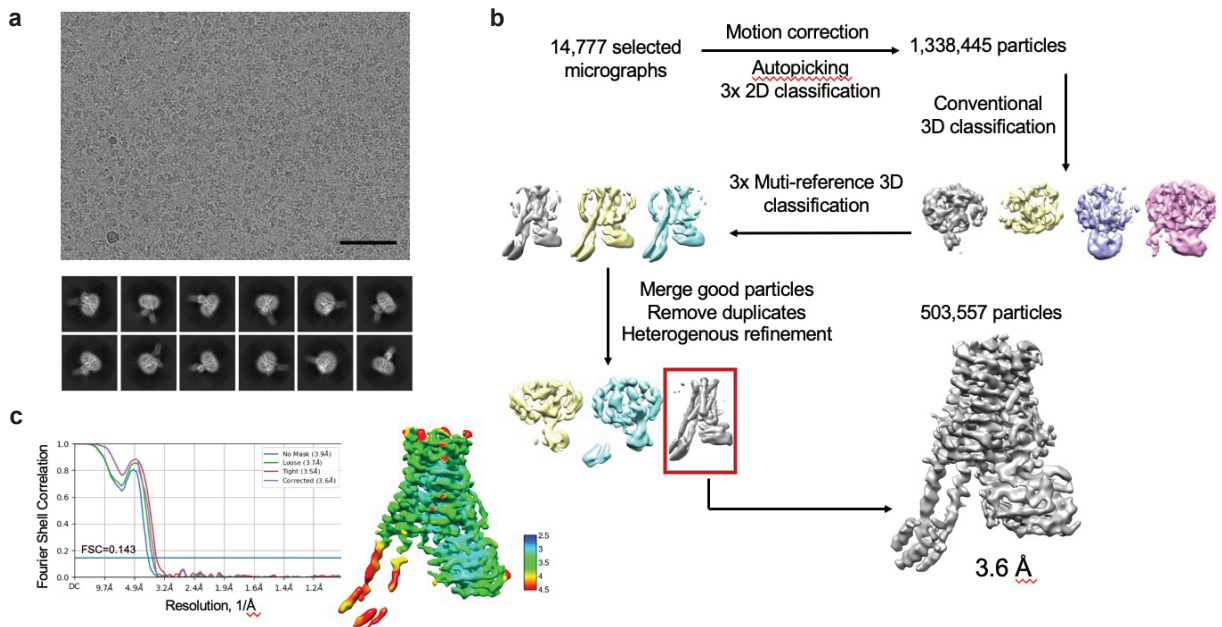

500

501 **Fig S2. Cryo-EM analysis of the GPR75 complex.**

502 (a). Representative electron micrograph and 2D class averages. The black scale bar in the top  
503 panel represents 50nm. (b). Flowchart for EM data processing. Details can be found in Methods.  
504 (c). The gold-standard Fourier shell correlation (FSC) curve for the final 3D reconstruction (left  
505 panel); Local-resolution map for the 3D EM reconstruction of GPR75 complex (right panel).

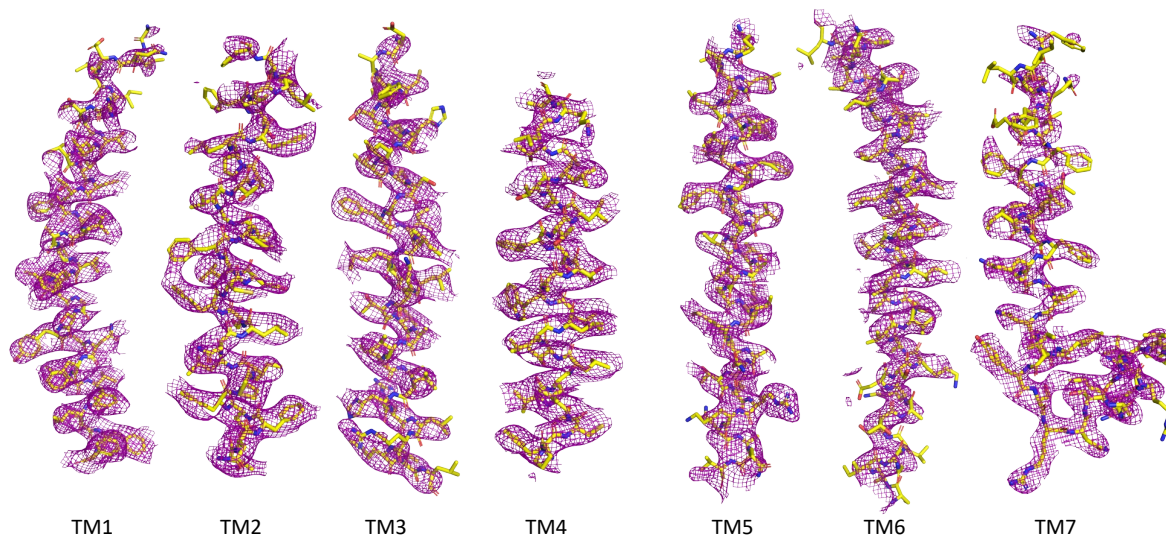

506

507 **Fig S3. Representative cryo-EM densities of seven transmembrane helices.**

508 Representative seven transmembrane helices regions of the GPR75 model are shown as yellow  
 509 cartoons and the density from the electron microscopy map as red mesh.

510

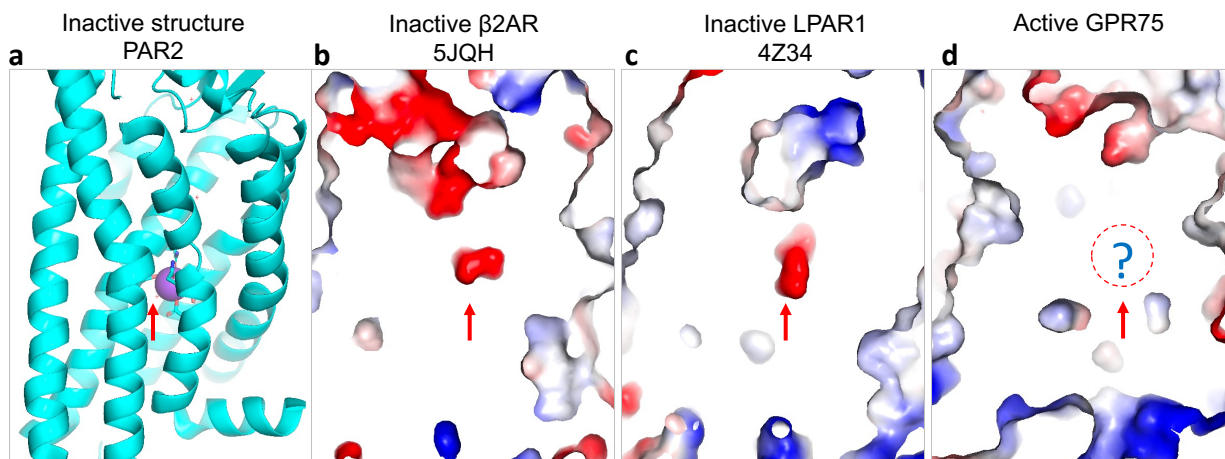

511

512 **Figure S4. Shrinking sodium binding pocket in the active-like state of GPR75.**

513 In the representative inactive Class A GPCR structures, there is a space for sodium binding,  
 514 while for the active GPR75, the sodium binding site may shrink due to the rearrangement.

515

516

517

518

519

520

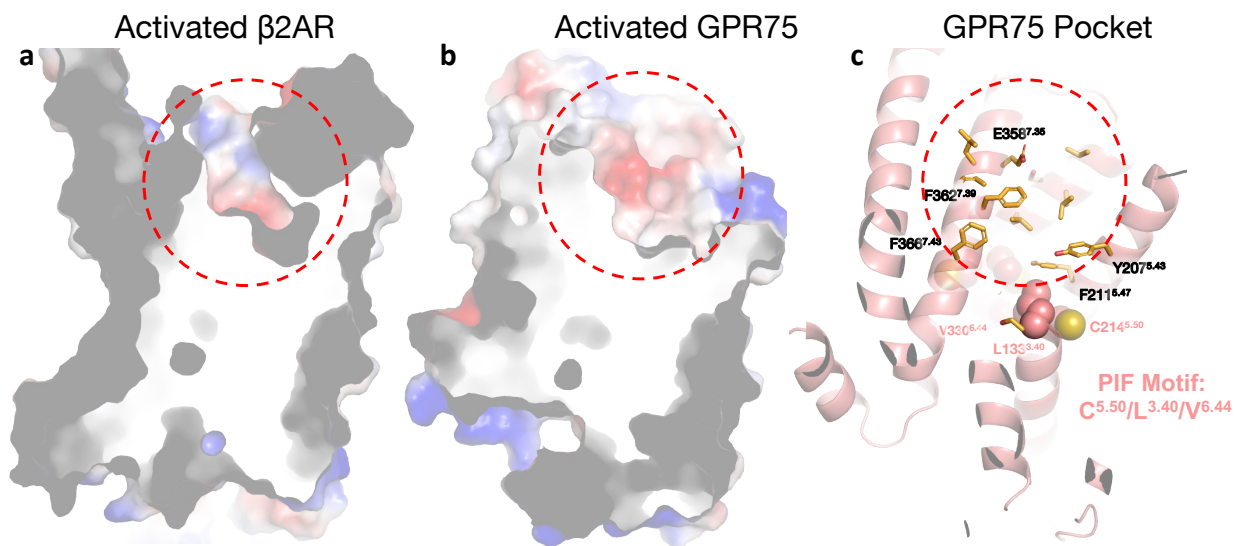

521

522 **Figure S5. The ligand binding pocket of GPR75.**

523 (a-b). The activated  $\beta_2$ AR shows a narrow ligand binding pocket, while the GPR75 exhibits a  
 524 large and shallow pocket. (c). The pocket is located near the C214<sup>5.50</sup> and is formed by a number  
 525 of hydrophobic residues. The PIF motif is noted as salmon spheres.

526

527 **Supplementary Table 1.** Cryo-EM data collection, refinement, and validation statistics

|                                                   | GPR75-NbH3 Consensus map |
|---------------------------------------------------|--------------------------|
| <b>Data collection and processing</b>             |                          |
| Magnification                                     | 130k                     |
| Voltage (kV)                                      | 300                      |
| Electron exposure ( $e^-/\text{\AA}^2$ )          | 50                       |
| Defocus range ( $\mu\text{m}$ )                   | -1.0~-2.0                |
| Pixel size ( $\text{\AA}$ )                       | 0.54                     |
| Symmetry imposed                                  | C1                       |
| Initial particle images (no.)                     | 2,968,809                |
| Final particle images (no.)                       | 503,557                  |
| Map resolution ( $\text{\AA}$ )                   | 3.64                     |
| FSC threshold                                     | 0.143                    |
| <b>Refinement</b>                                 |                          |
| Initial model used (PDB code)                     | AF2 predicted            |
| Model resolution ( $\text{\AA}$ )                 | 3.60                     |
| FSC threshold                                     | 0.143                    |
| Map sharpening <i>B</i> factor ( $\text{\AA}^2$ ) | -230                     |
| Model composition                                 |                          |
| Protein residues                                  | 523                      |
| R.m.s. deviations                                 |                          |
| Bond lengths ( $\text{\AA}$ )                     | 0.003                    |
| Bond angles ( $^\circ$ )                          | 0.678                    |
| Validation                                        |                          |
| Clashscore                                        | 10.90                    |
| Poor rotamers (%)                                 | 0.23                     |
| Ramachandran plot                                 |                          |
| Favored (%)                                       | 97.11                    |
| Allowed (%)                                       | 2.70                     |
| Disallowed (%)                                    | 0.19                     |

528

529

530
